# Supplementary material for: Protein–Protein Interactions in Translesion Synthesis
Source: MDPI journal article supplement (doi:10.3390/molecules26185544), 2021-09-13
Supplement: s1 [file s1]

# Protein–Protein Interactions in Translesion Synthesis

Radha Charan Dash and Kyle Hadden \*

Department of Pharmaceutical Sciences, University of Connecticut, 69 North Eagleville Rd,  
Storrs, CT 06029-3092, USA; radha.dash@uconn.edu

\* Correspondence: kyle.hadden@uconn.edu; Tel.: +1-860-486-8446

| Poli-UBQ |     |          |                       |                         |             |
|----------|-----|----------|-----------------------|-------------------------|-------------|
| Poli     | UBQ | Distance | Specific Interactions | Surface Complementarity | Buried SASA |
| F679     | L73 | 4.0 Å    |                       | 0.68                    | 9.40%       |
| S681     | T9  | 3.1 Å    |                       | 0.89                    | 12.80%      |
| D682     | T9  | 2.9 Å    |                       | 0.69                    | 79.60%      |
|          | L8  | 3.3 Å    |                       |                         |             |
|          | I36 | 3.5 Å    |                       |                         |             |
|          | T7  | 3.6 Å    |                       |                         |             |
| I683     | L69 | 3.9 Å    |                       | 0.77                    | 85.30%      |
|          | L8  | 3.7 Å    |                       |                         |             |
|          | T9  | 3.9 Å    |                       |                         |             |
| D684     | L8  | 2.9 Å    | H-Bond with L8        | 0.85                    | 46.80%      |
|          | T9  | 3.4 Å    |                       |                         |             |
| V687     | H68 | 3.5 Å    |                       | 0.87                    | 99.60%      |
|          | L8  | 3.5 Å    |                       |                         |             |
|          | G10 | 3.5 Å    |                       |                         |             |
|          | K6  | 3.8 Å    |                       |                         |             |
| F688     | t7  | 3.8 Å    |                       |                         |             |
| F688     | L8  | 3.6 Å    |                       | 0.95                    | 9.00%       |
| E690     | H68 | 3.4 Å    |                       | 0.93                    | 21.90%      |
| L691     | V70 | 3.4 Å    |                       | 0.89                    | 91.10%      |
|          | L8  | 3.8 Å    |                       |                         |             |
|          | H68 | 4.0 Å    |                       |                         |             |
| P692     | G47 | 3.5 Å    |                       | 0.86                    | 71.60%      |
|          | I44 | 3.7 Å    |                       |                         |             |
| V695     | Q49 | 3.3 Å    |                       | 0.89                    | 87.60%      |
|          | I44 | 3.8 Å    |                       |                         |             |
| E698     | R42 | 2.8 Å    | Salt bridge with R42  | 0.63                    | 35.20%      |
| L699     | L71 | 3.5 Å    |                       | 0.82                    | 99.30%      |
|          | V70 | 3.6 Å    |                       |                         |             |
| E702     | R74 | 2.8 Å    | Salt bridge with R74  | 0.89                    | 68.10%      |
|          | L73 | 3.4 Å    |                       |                         |             |
| W703     | L71 | 3.5 Å    |                       | 0.79                    | 70.40%      |
|          | L73 | 3.5 Å    |                       |                         |             |
| T706     | L73 | 3.4 Å    |                       | 0.85                    | 30.90%      |
| REV1-UBQ |     |          |                       |                         |             |
| REV1     | UBQ | Distance | Specific Interactions | Surface Complementarity | Buried SASA |

| P1010            | L8   | 3.7 Å    |                       | 0.84                    | 69.70%      |
|------------------|------|----------|-----------------------|-------------------------|-------------|
| Q1014            | T9   | 3.4 Å    |                       | 0.95                    | 24.70%      |
| V1015            | L8   | 3.4 Å    |                       | 0.86                    | 42.30%      |
| D1016            | L8   | 2.9 Å    | H-Bond with L8        | 0.85                    | 44.20%      |
|                  | G10  | 3.7 Å    |                       |                         |             |
|                  | T9   | 3.7 Å    |                       |                         |             |
| E1018            | L6   | 2.9 Å    | H-Bond with K6        | 0.61                    | 18.80%      |
| V1019            | H68  | 3.0 Å    | H-Bond with H68       | 0.85                    | 98.40%      |
|                  | L8   | 3.2 Å    |                       |                         |             |
|                  | T7   | 3.6 Å    |                       |                         |             |
|                  | L6   | 3.8 Å    |                       |                         |             |
| F1020            |      |          |                       | 0.74                    | 5.30%       |
| A1022            | H68  | 3.8 Å    |                       | 0.81                    | 27.70%      |
| L1023            | H68  | 3.5 Å    |                       | 0.77                    | 99.90%      |
| P1024            | G47  | 3.4 Å    |                       | 0.9                     | 75.80%      |
|                  | I44  | 3.7 Å    |                       |                         |             |
| L1027            | I44  | 3.3 Å    |                       | 0.77                    | 100.00%     |
|                  | R42  | 3.6 Å    |                       |                         |             |
|                  | V70  | 3.8 Å    |                       |                         |             |
| E1030            | R42  | 2.8 Å    | Hbond with R42        | 0.85                    | 51.20%      |
|                  | L73  | 3.8 Å    |                       |                         |             |
| L1031            | L73  | 3.7 Å    |                       | 0.8                     | 99.90%      |
|                  | L8   | 3.8 Å    |                       |                         |             |
| A1034            | L73  | 3.9 Å    |                       | 0.78                    | 58.40%      |
| PCNA-Pol PIP-Box |      |          |                       |                         |             |
| Pol              | PCNA | Distance | Specific Interactions | Surface Complementarity | Buried SASA |
| K421             | I255 | 3.3 Å    |                       | 0.93                    | 27.20%      |
| G422             | A252 | 3.4 Å    |                       | 0.94                    | 79.70%      |
|                  | I255 | 3.6 Å    |                       |                         |             |
|                  | P253 | 3.7 Å    |                       |                         |             |
|                  | V45  | 3.7 Å    |                       |                         |             |
| L423             | S43  | 3.5 Å    |                       | 0.9                     | 40.60%      |
|                  | H44  | 3.5 Å    |                       |                         |             |
|                  | A252 | 3.9 Å    |                       |                         |             |
| I424             | H44  | 2.8 Å    | H-Bond with H44       | 0.88                    | 99.10%      |
|                  | V45  | 3.4 Å    |                       |                         |             |
|                  | A252 | 3.6 Å    |                       |                         |             |
|                  | M40  | 3.7 Å    |                       |                         |             |
|                  | P234 | 3.8 Å    |                       |                         |             |
|                  | S46  | 3.8 Å    |                       |                         |             |
|                  | L47  | 3.9 Å    |                       |                         |             |
| D425             | Y250 | 4.0 Å    |                       |                         |             |
|                  | H44  | 3.4 Å    |                       | 0.91                    | 48.60%      |
|                  | M40  | 3.5 Å    |                       |                         |             |
| Y427             | P253 | 3.4 Å    |                       | 0.82                    | 82.70%      |
|                  | D232 | 3.5 Å    |                       |                         |             |
|                  | P129 | 3.5 Å    |                       |                         |             |
|                  | P234 | 3.6 Å    |                       |                         |             |

|                           |                                                         |                                                                      |                       |                         |             |
|---------------------------|---------------------------------------------------------|----------------------------------------------------------------------|-----------------------|-------------------------|-------------|
| L428                      | G127<br>L126                                            | 3.7 Å<br>4.0 Å                                                       |                       | 0.75                    | 81.60%      |
| M329                      | G127<br>L126                                            | 2.8 Å<br>3.9 Å                                                       | H-Bond with G127      | 0.79                    | 31.00%      |
| PCNA-Pol $\eta$ PIP-Box   |                                                         |                                                                      |                       |                         |             |
| Pol $\eta$                | PCNA                                                    | Distance                                                             | Specific Interactions | Surface Complementarity | Buried SASA |
| P698                      | Y211<br>S43                                             | 3.4 Å<br>3.8 Å                                                       |                       | 0.87                    | 67.90%      |
| E699                      | K254                                                    | 3.7 Å                                                                |                       | 0.71                    | 10.70%      |
| G700                      | I255<br>K254                                            | 2.7 Å<br>3.6 Å                                                       | H-Bond with I255      | 0.7                     | 56.00%      |
| M701                      | A252<br>V45<br>A208<br>L251                             | 3.1 Å<br>3.6 Å<br>3.8 Å<br>3.9 Å                                     |                       | 0.87                    | 87.60%      |
| Q702                      | P253<br>A252<br>I254<br>V45                             | 2.9 Å<br>3.2 Å<br>3.5 Å<br>3.6 Å                                     |                       | 0.86                    | 47.50%      |
| T703                      | H44                                                     | 3.4 Å                                                                |                       | 0.79                    | 38.90%      |
| L704                      | H44<br>S46<br>L47<br>M40<br>V45<br>P234<br>A252<br>L126 | 2.9 Å<br>3.4 Å<br>3.5 Å<br>3.5 Å<br>3.6 Å<br>3.7 Å<br>3.7 Å<br>3.9 Å | H-Bond with H44       | 0.9                     | 100.00%     |
| E705                      | H44<br>E124                                             | 2.7 Å<br>3.2 Å                                                       | H-Bond with H44       | 0.85                    | 51.80%      |
| F707                      | D232<br>P234<br>P253<br>A252                            | 3.4 Å<br>3.6 Å<br>3.6 Å<br>4.0 Å                                     |                       | 0.89                    | 57.00%      |
| F708                      | Y250<br>I128<br>L126<br>G127<br>P129<br>P234            | 3.5 Å<br>3.5 Å<br>3.7 Å<br>3.7 Å<br>3.9 Å<br>4.0 Å                   |                       | 0.87                    | 97.40%      |
| K709                      | G127<br>L126                                            | 3.1 Å<br>4.0 Å                                                       | H-Bond with G127      | 0.8                     | 7.60%       |
| P710                      | I25<br>L126                                             | 3.3 Å<br>3.7 Å                                                       |                       | 0.85                    | 48.20%      |
| L711                      | Q125                                                    | 2.9 Å                                                                | H-Bond with G127      | 0.77                    | 36.00%      |
| PCNA-Pol $\kappa$ PIP-Box |                                                         |                                                                      |                       |                         |             |
| Pol $\kappa$              | PCNA                                                    | Distance                                                             | Specific Interactions | Surface Complementarity | Buried SASA |
| P861                      | V45                                                     | 3.3 Å                                                                |                       | 0.85                    | 28.00%      |

|                  |       |          |                       |                         |             |
|------------------|-------|----------|-----------------------|-------------------------|-------------|
| K862             | S43   | 3.3 Å    |                       | 0.85                    | 21.20%      |
| H863             | S43   | 3.1 Å    | H-Bond with S43       | 0.88                    | 30.50%      |
|                  | H44   | 3.2 Å    | H-Bond with H44       |                         |             |
| T864             | A252  | 3.2 Å    |                       | 0.86                    | 79.70%      |
|                  | H44   | 3.5 Å    |                       |                         |             |
|                  | V45   | 3.9 Å    |                       |                         |             |
| L865             | H44   | 3.2 Å    | H-Bond with H44       | 0.88                    | 100.00%     |
|                  | S46   | 3.3 Å    |                       |                         |             |
|                  | P234  | 3.5 Å    |                       |                         |             |
|                  | L47   | 3.5 Å    |                       |                         |             |
|                  | M40   | 3.5 Å    |                       |                         |             |
|                  | V45   | 3.6 Å    |                       |                         |             |
|                  | A252  | 3.9 Å    |                       |                         |             |
| D866             | M40   | 3.4 Å    |                       | 0.77                    | 39.30%      |
|                  | H44   | 3.5 Å    |                       |                         |             |
| F868             | D232  | 3.1 Å    |                       | 0.86                    | 56.00%      |
|                  | P234  | 3.6 Å    |                       |                         |             |
|                  | V233  | 4.0 Å    |                       |                         |             |
| F869             | G127  | 3.3 Å    | Pi-pi stack to Y250   | 0.81                    | 95.00%      |
|                  | L126  | 3.5 Å    |                       |                         |             |
|                  | L47   | 3.5 Å    |                       |                         |             |
|                  | Y250  | 3.6 Å    |                       |                         |             |
|                  | I128  | 3.9 Å    |                       |                         |             |
|                  | P129  | 4.0 Å    |                       |                         |             |
| K870             | G127  | 3.2 Å    | H-Bond with G127      | 0.87                    | 9.30%       |
|                  | L126  | 3.7 Å    |                       |                         |             |
| REV1-CT/Polκ RIR |       |          |                       |                         |             |
| Polκ             | REV1  | Distance | Specific Interactions | Surface Complementarity | Buried SASA |
| S566             | M1183 | 3.2 Å    |                       | 0.86                    | 66.30%      |
|                  | D1186 | 3.2 Å    |                       |                         |             |
|                  | E1185 | 3.3 Å    |                       |                         |             |
| F567             | D1186 | 3.1 Å    | H-Bond with D1186     | 0.86                    | 90.70%      |
|                  | W1185 | 3.3 Å    |                       |                         |             |
|                  | L1171 | 3.6 Å    |                       |                         |             |
|                  | I1179 | 3.7 Å    |                       |                         |             |
| F568             | D1186 | 2.7 Å    | H-Bond with D1186     | 0.82                    | 99.30%      |
|                  | A1160 | 3.5 Å    |                       |                         |             |
|                  | W1185 | 3.5 Å    |                       |                         |             |
|                  | L1171 | 3.7 Å    |                       |                         |             |
|                  | V1190 | 3.7 Å    |                       |                         |             |
| D569             | Q1189 | 3.4 Å    |                       | 0.25                    | 28.00%      |
| K571             | A1160 | 3.2 Å    |                       | 0.68                    | 44.30%      |
|                  | L1171 | 3.5 Å    |                       |                         |             |
| REV1-CT/Polη RIR |       |          |                       |                         |             |
| Polη             | REV1  | Distance | Specific Interactions | Surface Complementarity | Buried SASA |
| G529             | P1182 | 3.1 Å    |                       | 0.45                    | 24.30%      |
| P530             | P1182 | 3.6 Å    |                       | 0.75                    | 49.50%      |
|                  | D1186 | 3.6 Å    |                       |                         |             |

|                   |       |          |                       |                         |             |
|-------------------|-------|----------|-----------------------|-------------------------|-------------|
| F531              | D1186 | 3.1 Å    | H-Bond with D1186     | 0.79                    | 70.50%      |
|                   | P1182 | 3.4 Å    |                       |                         |             |
|                   | W1175 | 3.5 Å    |                       |                         |             |
|                   | I1179 | 3.7 Å    |                       |                         |             |
|                   | D1181 | 4.0 Å    |                       |                         |             |
| F532              | D1186 | 2.9 Å    | Pi–pi stack to W1175  | 0.89                    | 99.80%      |
|                   | L1159 | 3.4 Å    |                       |                         |             |
|                   | A1160 | 3.4 Å    |                       |                         |             |
|                   | Q1189 | 3.4 Å    |                       |                         |             |
|                   | L1172 | 3.4 Å    |                       |                         |             |
|                   | V1190 | 3.5 Å    |                       |                         |             |
|                   | W1175 | 3.5 Å    |                       |                         |             |
| K533              | D1186 | 3.3 Å    | H-Bond to D1186       | 0.59                    | 46.60%      |
|                   | Q1189 | 3.7 Å    |                       |                         |             |
| K535              | A1160 | 3.1 Å    |                       | 0.9                     | 29.60%      |
|                   | G1161 | 3.3 Å    |                       |                         |             |
| S536              | G1161 | 3.5 Å    |                       | 0.87                    | 45.50%      |
|                   | A1160 | 3.7 Å    |                       |                         |             |
| L539              | G1161 | 3.4 Å    |                       | 0.79                    | 39.20%      |
|                   | N1158 | 3.5 Å    |                       |                         |             |
| REV1-CT/PolD3 RIR |       |          |                       |                         |             |
| PolD3             | REV1  | Distance | Specific Interactions | Surface Complementarity | Buried SASA |
| N233              | E1185 | 3.1 Å    | H-Bond with E1185     | 0.85                    | 20.60%      |
|                   | M1183 | 3.4 Å    |                       |                         |             |
| M234              | M1183 | 3.6 Å    |                       | 0.87                    | 39.50%      |
|                   | E1185 | 3.8 Å    |                       |                         |             |
| M235              | M1183 | 3.7 Å    |                       | 0.72                    | 15.90%      |
| S236              | M1183 | 3.2 Å    |                       | 0.78                    | 4.30%       |
| N237              | E1185 | 3.0 Å    |                       | 0.82                    | 95.40%      |
|                   | D1186 | 3.4 Å    |                       |                         |             |
|                   | M1183 | 3.4 Å    |                       |                         |             |
| F238              | D1186 | 3.1 Å    | H-Bond with D1186     | 0.84                    | 64.00%      |
|                   | W1175 | 3.2 Å    |                       |                         |             |
|                   | E1174 | 3.4 Å    |                       |                         |             |
|                   | I1179 | 3.6 Å    |                       |                         |             |
|                   | M1183 | 3.8 Å    |                       |                         |             |
|                   | L1171 | 3.8 Å    |                       |                         |             |
| F239              | D1186 | 3.0 Å    | H-Bond with D1186     | 0.83                    | 100.00%     |
|                   | A1160 | 3.3 Å    |                       |                         |             |
|                   | L1171 | 3.3 Å    |                       |                         |             |
|                   | Q1189 | 3.4 Å    |                       |                         |             |
|                   | V1190 | 3.4 Å    |                       |                         |             |
|                   | W1175 | 3.4 Å    |                       |                         |             |
|                   | L1172 | 3.6 Å    |                       |                         |             |
|                   | L1159 | 3.8 Å    |                       |                         |             |
| G240              | D1186 | 3.7 Å    |                       | 0.77                    | 21.40%      |
| A242              | A1160 | 3.4 Å    |                       | 0.69                    | 41.80%      |
|                   | L1171 | 3.9 Å    |                       |                         |             |
| A243              | A1160 | 3.5 Å    |                       | 0.67                    | 37.50%      |

|                           |                |                |                                         |                         |             |
|---------------------------|----------------|----------------|-----------------------------------------|-------------------------|-------------|
| M244                      | A1160<br>G1161 | 2.9 Å<br>3.7 Å | H-Bond with A1160                       | 0.89                    | 28.00%      |
| REV1-REV7                 |                |                |                                         |                         |             |
| REV1                      | REV7           | Distance       | Specific Interactions                   | Surface Complementarity | Buried SASA |
| E1200                     | K198           | 2.9 Å          | H-Bond with K198                        | 0.83                    | 16.20%      |
| E1201                     | Q200           | 2.7 Å          |                                         | 0.83                    | 52.30%      |
|                           | K198           | 3.1 Å          |                                         |                         |             |
|                           | E101           | 3.7 Å          |                                         |                         |             |
| D1202                     | T191           | 3.9 Å          |                                         | 0.9                     | 57.40%      |
|                           | Q200           | 3.4 Å          |                                         |                         |             |
| L1203                     | Q200           | 2.9 Å          | H-Bond with Q200                        | 0.77                    | 100.00%     |
|                           | P188           | 3.3 Å          |                                         |                         |             |
|                           | Y202           | 4.0 Å          |                                         |                         |             |
| E1204                     | K190           | 3.3 Å          | H-Bond and salt bridge with K190        | 0.86                    | 82.40%      |
|                           | T191           | 3.3 Å          |                                         |                         |             |
|                           | L189           | 3.9 Å          |                                         |                         |             |
| D1207                     | P188           | 3.8 Å          |                                         | 0.73                    | 73.00%      |
| L1240                     | L186           | 3.9 Å          |                                         | 0.82                    | 100.00%     |
| Y1244                     | E101           | 2.9 Å          | H-Bond with E101<br>Pi-pi stack to Y202 | 0.71                    | 80.00%      |
|                           | Y202           | 3.4 Å          |                                         |                         |             |
|                           | Q200           | 3.5 Å          |                                         |                         |             |
|                           | E204           | 3.7 Å          |                                         |                         |             |
| G1245                     | P184           | 3.8 Å          |                                         | 0.88                    | 35.00%      |
| S1246                     | E204           | 3.1 Å          |                                         | 0.82                    | 100.00%     |
|                           | P184           | 3.6 Å          |                                         |                         |             |
|                           | L186           | 3.8 Å          |                                         |                         |             |
| T1247                     | L186           | 3.0 Å          | Hbond with L186                         | 0.85                    | 58.20%      |
|                           | R185           | 3.3 Å          |                                         |                         |             |
|                           | P184           | 3.6 Å          |                                         |                         |             |
| L1248                     | L186           | 3.5 Å          |                                         | 0.83                    | 85.30%      |
|                           | P188           | 3.9 Å          |                                         |                         |             |
| REV7-REV3 <sub>RBM1</sub> |                |                |                                         |                         |             |
| REV3 <sub>RBM1</sub>      | REV7           | Distance       | Specific Interactions                   | Surface Complementarity | Buried SASA |
| T1874                     | A174           | 3.7 Å          |                                         | 0.57                    | 30.80%      |
| A1875                     | L173           | 3.5 Å          |                                         | 0.83                    | 44.60%      |
|                           | A155           | 3.6 Å          |                                         |                         |             |
| N1876                     | T152           | 2.9 Å          | H-Bond with T152                        | 0.8                     | 75.80%      |
|                           | H151           | 3.4 Å          |                                         |                         |             |
|                           | V150           | 3.6 Å          |                                         |                         |             |
|                           | E154           | 3.8 Å          |                                         |                         |             |
|                           | A155           | 4.0 Å          |                                         |                         |             |
| I1877                     | A174           | 2.9 Å          | H-Bond with A174                        | 0.82                    | 95.40%      |
|                           | V150           | 3.3 Å          |                                         |                         |             |
|                           | L173           | 3.4 Å          |                                         |                         |             |
|                           | H151           | 3.5 Å          |                                         |                         |             |
|                           | V179           | 3.8 Å          |                                         |                         |             |

| L1878                     | V150 | 2.9 Å    | H-Bond with to V150                     | 0.79                    | 98.50%      |
|---------------------------|------|----------|-----------------------------------------|-------------------------|-------------|
|                           | I172 | 3.3 Å    |                                         |                         |             |
|                           | L173 | 3.4 Å    |                                         |                         |             |
|                           | L149 | 3.5 Å    |                                         |                         |             |
|                           | W171 | 3.5 Å    |                                         |                         |             |
|                           | M160 | 3.7 Å    |                                         |                         |             |
| K1879                     | I172 | 2.9 Å    | H-Bond with I172<br>Salt bridge to D178 | 0.83                    | 80.40%      |
|                           | D178 | 3.0 Å    |                                         |                         |             |
|                           | W171 | 3.4 Å    |                                         |                         |             |
|                           | V148 | 3.4 Å    |                                         |                         |             |
|                           | L149 | 3.5 Å    |                                         |                         |             |
|                           | A174 | 3.9 Å    |                                         |                         |             |
| P1880                     | T147 | 3.9 Å    |                                         | 0.72                    | 97.20%      |
|                           | V148 | 3.3 Å    |                                         |                         |             |
|                           | W171 | 3.6 Å    |                                         |                         |             |
|                           | P170 | 3.6 Å    |                                         |                         |             |
|                           | Y63  | 3.9 Å    |                                         |                         |             |
| L1881                     | F169 | 3.9 Å    | H-Bond with P170                        | 0.81                    | 44.60%      |
|                           | P170 | 3.1 Å    |                                         |                         |             |
| M1882                     | Y63  | 2.9 Å    | H-Bond with Y63                         | 0.56                    | 42.20%      |
|                           | D168 | 3.6 Å    |                                         |                         |             |
| P1884                     | F146 | 3.2 Å    |                                         | 0.88                    | 92.60%      |
|                           | Y63  | 3.3 Å    |                                         |                         |             |
|                           | Y37  | 3.9 Å    |                                         |                         |             |
| P1885                     | Y37  | 2.4 Å    | H-Bond with Y37                         | 0.72                    | 91.70%      |
|                           | L60  | 3.8 Å    |                                         |                         |             |
| S1886                     | Y37  | 3.7 Å    |                                         | 0.92                    | 38.00%      |
| R1887                     | V36  | 3.0 Å    | H-Bond with V36                         | 0.88                    | 63.60%      |
|                           | P38  | 3.2 Å    |                                         |                         |             |
|                           | Y37  | 3.3 Å    |                                         |                         |             |
|                           | E35  | 3.5 Å    |                                         |                         |             |
| E1889                     | E59  | 3.2 Å    |                                         | 0.31                    | 22.30%      |
|                           | E57  | 3.7 Å    |                                         |                         |             |
| I1890                     | E57  | 3.2 Å    |                                         | 0.63                    | 95.70%      |
|                           | I41  | 3.9 Å    |                                         |                         |             |
| T1894                     | E57  | 2.9 Å    | H-Bond with E57                         | 0.7                     | 26.10%      |
| REV7-REV3 <sub>RBM2</sub> |      |          |                                         |                         |             |
| REV3 <sub>RBM2</sub>      | REV7 | Distance | Specific Interactions                   | Surface Complementarity | Buried SASA |
| K1990                     | A156 | 3.1 Å    | H-Bond with A156                        | 0.71                    | 15.00%      |
|                           | A155 | 4.0 Å    |                                         |                         |             |
| K1991                     | E81  | 2.8 Å    | H-Bond and Salt bridge, to E81          | 0.89                    | 54.50%      |
|                           | E154 | 3.4 Å    |                                         |                         |             |
|                           | T152 | 3.5 Å    |                                         |                         |             |
|                           | R153 | 3.9 Å    |                                         |                         |             |
| I1992                     | T152 | 2.9 Å    | 2 H-Bonds with T152<br>H-Bond with E154 | 0.84                    | 88.30%      |
|                           | E154 | 2.9 Å    |                                         |                         |             |
|                           | M160 | 3.6 Å    |                                         |                         |             |
|                           | L173 | 3.8 Å    |                                         |                         |             |

|       |      |       |                                       |      |         |
|-------|------|-------|---------------------------------------|------|---------|
|       | A155 | 3.9 Å |                                       |      |         |
|       | H151 | 4.0 Å |                                       |      |         |
| V1993 | A174 | 2.9 Å | H-Bond with A174                      | 0.9  | 88.10%  |
|       | V150 | 3.5 Å |                                       |      |         |
|       | L173 | 3.5 Å |                                       |      |         |
|       | H151 | 3.5 Å |                                       |      |         |
| I1994 | V150 | 2.8 Å | 2 H-Bond with V150                    | 0.85 | 97.60%  |
|       | I172 | 3.3 Å |                                       |      |         |
|       | L149 | 3.4 Å |                                       |      |         |
|       | I166 | 3.5 Å |                                       |      |         |
|       | W171 | 3.5 Å |                                       |      |         |
|       | L173 | 3.9 Å |                                       |      |         |
| M1995 | I172 | 2.8 Å | 2 H-Bond with I172                    | 0.89 | 85.60%  |
|       | D178 | 3.3 Å |                                       |      |         |
|       | W171 | 3.3 Å |                                       |      |         |
|       | V148 | 3.4 Å |                                       |      |         |
|       | T147 | 3.4 Å |                                       |      |         |
|       | A174 | 3.8 Å |                                       |      |         |
|       | L149 | 3.9 Å |                                       |      |         |
| P1996 | V148 | 3.1 Å |                                       | 0.83 | 91.40%  |
|       | Y63  | 3.5 Å |                                       |      |         |
|       | W171 | 3.6 Å |                                       |      |         |
|       | P170 | 4.0 Å |                                       |      |         |
| C1997 | P170 | 3.0 Å | 1 H-Bond with P170                    | 0.84 | 62.50%  |
|       | W171 | 3.6 Å |                                       |      |         |
|       | I172 | 3.8 Å |                                       |      |         |
|       | I163 | 3.8 Å |                                       |      |         |
| K1998 | Y63  | 2.9 Å | Salt bridge to E59<br>H-Bond with Y63 | 0.82 | 25.90%  |
|       | E59  | 3.8 Å |                                       |      |         |
| C1999 | Y63  | 3.5 Å |                                       | 0.89 | 17.40%  |
| A2000 | F146 | 3.3 Å |                                       | 0.88 | 90.80%  |
|       | Y37  | 3.4 Å |                                       |      |         |
|       | Y63  | 3.4 Å |                                       |      |         |
| P2001 | Y37  | 2.7 Å | H-Bond with Y37                       | 0.77 | 91.60%  |
|       | E59  | 3.7 Å |                                       |      |         |
|       | L60  | 3.8 Å |                                       |      |         |
| R2003 | E35  | 2.9 Å | 2 H-Bond with E35<br>H-Bond with C144 | 0.81 | 75.00%  |
|       | C144 | 2.9 Å |                                       |      |         |
|       | V36  | 3.2 Å |                                       |      |         |
|       | G143 | 4.0 Å |                                       |      |         |
|       | Y37  | 4.0 Å |                                       |      |         |
| L1005 | E59  | 3.5 Å |                                       | 0.72 | 23.00%  |
| V2006 | Y37  | 3.7 Å |                                       | 0.88 | 100.00% |
|       | I41  | 3.7 Å |                                       |      |         |
|       | H57  | 3.8 Å |                                       |      |         |
|       | P38  | 3.9 Å |                                       |      |         |
| Q2007 | P38  | 3.8 Å |                                       | 0.91 | 19.10%  |
| W2009 | C56  | 3.5 Å | 2 pi–pi stack with H57                | 0.85 | 52.70%  |
|       | H57  | 3.5 Å |                                       |      |         |



|       |     |       |      |        |
|-------|-----|-------|------|--------|
|       | P58 | 3.7 Å |      |        |
|       | I41 | 4.0 Å |      |        |
| L2010 | G40 | 3.7 Å | 0.94 | 56.40% |
|       | P38 | 3.8 Å |      |        |

### Surface Complementarity Algorithm:

The surface complementarity is calculated using the method of Lawrence and Colman [36]. The complementarity at any point on the molecular surface (Connolly surface) of one protein (A) is determined by finding the nearest point on the molecular surface of the other protein (B), and comparing the normal vectors to the two surfaces at those points, with a weighting function involving the distance between the points. Perfect complementarity is achieved if the vectors are parallel and the distance is zero. The function that defines the complementarity of A to B is:

$$S^{A \rightarrow B}(x_A) = (n_A \cdot n'_A) \exp[-w(|x_A - x'_A|)^2] \quad (1)$$

where  $x_A$  is the point on surface A,  $x'_A$  is the point on surface B nearest to  $x_A$ ,  $n_A$  is the outward normal to surface A at  $x_A$ ,  $n'_A$  is the *inward* normal to surface A at  $x'_A$ , and  $w$  is constant  $0.5 \text{ Å}^{-2}$

The same is carried out for protein B, and the mean of the two median values is taken as the surface complementarity correlation,

$$S_c = (\{S^{A \rightarrow B}\} + \{S^{B \rightarrow A}\})/2 \quad (2)$$

where the braces represent the median value. A value of 1 means perfect matching of the surface shape; a value of 0 means that the shapes are uncorrelated. Further details about the limits on the surface and the treatment of buried surface regions can be found in [36] in the manuscript.
